# Supplementary material for: In Silico–Ex Vitro Iteration Strategy for Affinity Maturation of Anti-Ricin Peptides and the SPR Biosensing Application
Source: MDPI journal article supplement (doi:10.3390/toxins15080490), 2023-08-03
Supplement: s1 [file s1]

# Supplementary Materials: In Silico–Ex Vitro Iteration Strategy for Affinity Maturation of Anti-Ricin Peptides and the SPR Biosensing Application

Zhifang Yang, Chuang Wang, Jia Liu, Lan Xiao, Lei Guo<sup>1</sup> and Jianwei Xie

## 1. Molecular Docking of Enriched Peptides and Ricin

PD-2-R15 mainly interacted with key amino acids in the primary pocket of ricin through hydrogen bonds. LEU9, SER12, and LEU10 created hydrogen bonds with Tyr123 and Arg180, respectively. LEU9 and LEU10 interacted with Tyr80 and Trp211 by Pi-Alkyl at 5.43 Å and 4.79 Å.

The molecular docking results showed that the interaction of PD-2-R19 and ricin was through hydrogen bonds. Mainly, TYR3 interacted with Arg48 and Asn78 in the “entrance” of the secondary pocket. Among them, the LEU6 of PD-2-R19 interacted with Tyr80 through hydrogen bonding. ALA9, GLU12, and SER11 interacted with Tyr123 through hydrogen bonding. ALA10 and SER11 interacted with the Arg180 of ricin via hydrogen bonding. The active amino acid distance between PD-2-R19 and the ricin active pocket was within 5 Å. The ZRank of the peptide and ricin was -40.09. It was shown that PD-2-R19 interacted with ricin in a stable posture and had a higher affinity.

In addition, molecular simulations of PD-R23 with ricin used H-DOCK instead of DS. The result of the complexes revealed that PRO6, SER7, ILE 8, MET10, GLY4, LEU11, ALA12, and LEU11 bound to the Tyr80, Asp96, Asp100, Gly121, Asn122, Tyr123, Glu177, Arg180, and Trp211 of the primary pocket of ricin within 5 Å. THR5, PRO 6, and SER7 interacted with Asn78 in the “entrance” of the secondary pocket at 4.75 Å, 2.33 Å, and 2.75 Å, respectively.

**Table S1.** The affinity and kinetic parameters of peptides and abrin by SPR.

| Peptide  | $k_a$ ( $M^{-1}s^{-1}$ ) | $k_d$ ( $s^{-1}$ )   | $K_D$ ( $\mu M$ ) | Chi <sup>2</sup> | U-value |
|----------|--------------------------|----------------------|-------------------|------------------|---------|
| PD-2-R5  | 400.5                    | $1.0 \times 10^{-2}$ | 27.8              | 8.18             | 20      |
| PD-2-R15 | 99.07                    | $1.0 \times 10^{-2}$ | 48.6              | 0.44             | 3       |
| PD-2-R19 | 361.6                    | $4.0 \times 10^{-2}$ | 138.1             | 0.63             | 9       |

**Table S2.** The affinity and kinetic parameters of alanine scanning mutants to ricin.

| Peptide    | $k_a$ ( $M^{-1}s^{-1}$ ) | $k_d$ ( $s^{-1}$ )   | $K_D$ ( $\mu M$ ) | Chi <sup>2</sup> | U-value |
|------------|--------------------------|----------------------|-------------------|------------------|---------|
| PD-2-R5    | $4.7 \times 10^2$        | $2.0 \times 10^{-3}$ | 4.7               | 6.5              | 0.22    |
| PD-2-R5-1  | $6.3 \times 10^2$        | $4.2 \times 10^{-3}$ | 6.7               | 5.0              | 3       |
| PD-2-R5-2  | $5.1 \times 10^2$        | $2.3 \times 10^{-3}$ | 4.5               | 2.3              | 4       |
| PD-2-R5-3  | -                        | -                    | N/A               | -                | -       |
| PD-2-R5-4  | -                        | -                    | N/A               | -                | -       |
| PD-2-R5-5  | -                        | -                    | N/A               | -                | -       |
| PD-2-R5-7  | $2.1 \times 10^3$        | $6.8 \times 10^{-3}$ | 3.2               | 16               | 12      |
| PD-2-R5-8  | -                        | -                    | N/A               | -                | -       |
| PD-2-R5-9  | -                        | -                    | N/A               | -                | -       |
| PD-2-R5-10 | $4.5 \times 10^3$        | 0.18                 | 41                | 9                | 7       |
| PD-2-R5-11 | -                        | -                    | N/A               | -                | -       |
| PD-2-R5-12 | $8.2 \times 10^2$        | $3.1 \times 10^{-3}$ | 3.9               | 3.5              | 2       |

**Table S3.** The interaction sites of PD-2-R5-T3 and PD-2-R5-T4 (site marked by all-capitalized three-letter symbol) with ricin (site marked by first-word capitalized three-letter symbol)

| Peptide    | Docking Score | Interaction sites |        | Distance (Å) |
|------------|---------------|-------------------|--------|--------------|
| PD-2-R5-T3 | -200.9        | SER2              | Arg48  | 3.68         |
|            |               | TYR3              | Arg48  | 4.10         |
|            |               | GLN1              | Asn78  | 4.32         |
|            |               | TYR3              | Tyr78  | 2.49         |
|            |               | TYR3              | Tyr80  | 3.46         |
|            |               | TRP4              | Tyr80  | 2.39         |
|            |               | ASN5              | Tyr80  | 4.92         |
|            |               | CYS7              | Tyr80  | 3.05         |
|            |               | PHE8              | Tyr80  | 3.03         |
|            |               | TYR3              | Asp96  | 3.00         |
|            |               | ALA6              | Asp96  | 3.05         |
|            |               | CYS7              | Asp96  | 2.95         |
|            |               | CYS10             | Asp96  | 3.89         |
|            |               | HIS12             | Asp96  | 3.79         |
|            |               | TYR3              | Asp100 | 2.11         |
|            |               | CYS7              | Gly121 | 4.28         |
|            |               | HIS12             | Gly121 | 4.67         |

|            |        |        |        |      |
|------------|--------|--------|--------|------|
|            |        | PHE8   | Tyr123 | 3.26 |
|            |        | TRP4   | Glu177 | 4.81 |
|            |        | TRP4   | Arg180 | 2.77 |
|            |        | TRP4   | Glu208 | 3.69 |
|            |        | GLN1   | Trp211 | 3.52 |
|            |        | TRP4   | Trp211 | 3.54 |
| PD-2-R5-T4 | -187.9 | ARG11  | Arg48  | 4.83 |
|            |        | ARG11  | Asn78  | 3.49 |
|            |        | CYS 7  | Tyr80  | 2.87 |
|            |        | PHE8   | Tyr80  | 2.61 |
|            |        | SER9   | Tyr80  | 4.29 |
|            |        | CYS10  | Tyr80  | 3.39 |
|            |        | HIS 12 | Tyr80  | 3.71 |
|            |        | ARG4   | Asp96  | 3.79 |
|            |        | ASN5   | Asp96  | 2.08 |
|            |        | ALA6   | Asp96  | 4.24 |
|            |        | PHE8   | Asp96  | 2.27 |
|            |        | SER9   | Asp96  | 1.93 |
|            |        | PHE8   | Asp100 | 3.45 |
|            |        | PHE8   | Gly121 | 3.70 |
|            |        | HIS12  | Tyr123 | 4.20 |
|            |        | HIS12  | Glu177 | 3.68 |
|            |        | HIS12  | Arg180 | 2.59 |
|            |        | ARG11  | Glu208 | 4.59 |
|            |        | HIS12  | Glu208 | 0.77 |
|            |        | ARG11  | Trp211 | 3.41 |
|            |        | HIS12  | Trp211 | 3.14 |

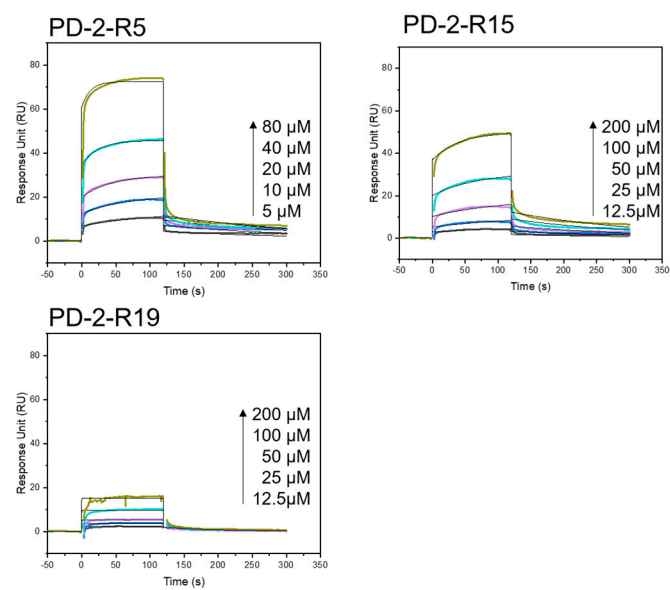

**Figure S1.** The MCK of peptides and abrin by SPR.

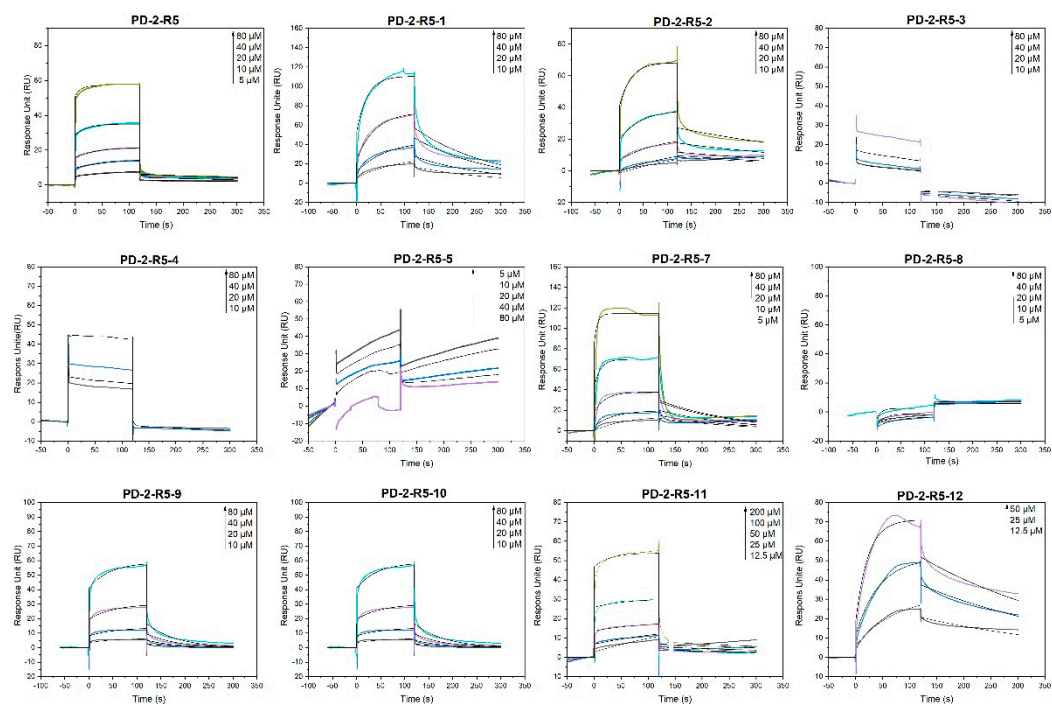

**Figure S2.** The MCK curves and kinetic fitting of alanine scanning mutants binding to ricin.
